# Supplementary material for: Trends in Maternal Mortality and Severe Maternal Morbidity During Delivery-Related Hospitalizations in the United States, 2008 to 2021
Source: PubMed Central journal article supplement (PMC10288331; doi:10.1001/jamanetworkopen.2023.17641), 2023-06-22
Supplement: jamanetwopen-e2317641-s002.pdf [file jamanetwopen-e2317641-s002.pdf]

## Data Sharing Statement

Fink. Trends in Maternal Mortality and Severe Maternal Morbidity During Delivery-Related Hospitalizations in the United States, 2008 to 2021. *JAMA Netw Open*. Published June 22, 2023. doi:10.1001/jamanetworkopen.2023.17641

### Data

**Data available:** No

### Additional Information

**Explanation for why data not available:** Can not make this data available to others due to proprietary assets of Premier Inc. and HHS.
